# Supplementary material
Source: PubMed Central journal article supplement (PMC3193501)
Supplement: cr201121x1.pdf [file cr201121x1.pdf]

## Supplementary information, Figure S1

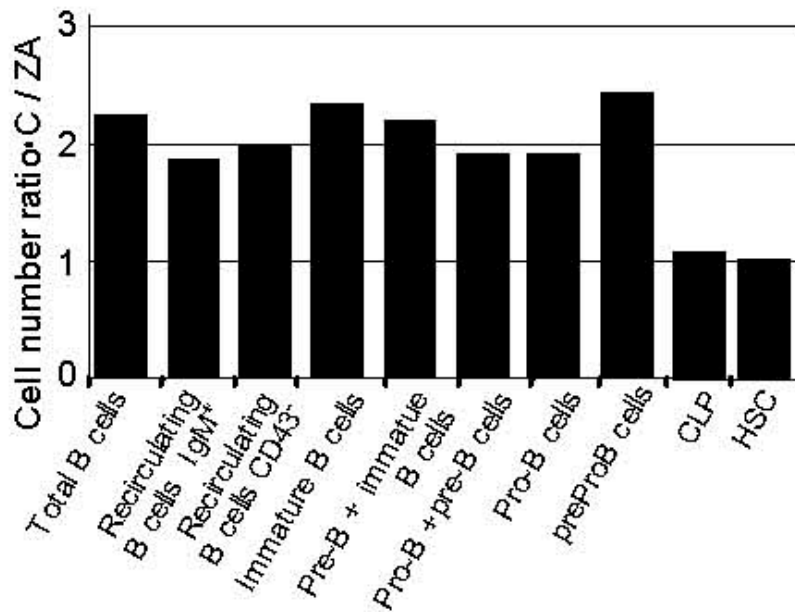

**Figure 1** B cell differentiation in ZA-treated mice is reduced from the pre-pro-B stage. Ratio of the mean cell number for each subset between PBS- and ZA-treated mice was calculated from the flow cytometry analysis presented in Figure 3.
